# Supplementary material
Source: PubMed Central journal article supplement (PMC1472438)

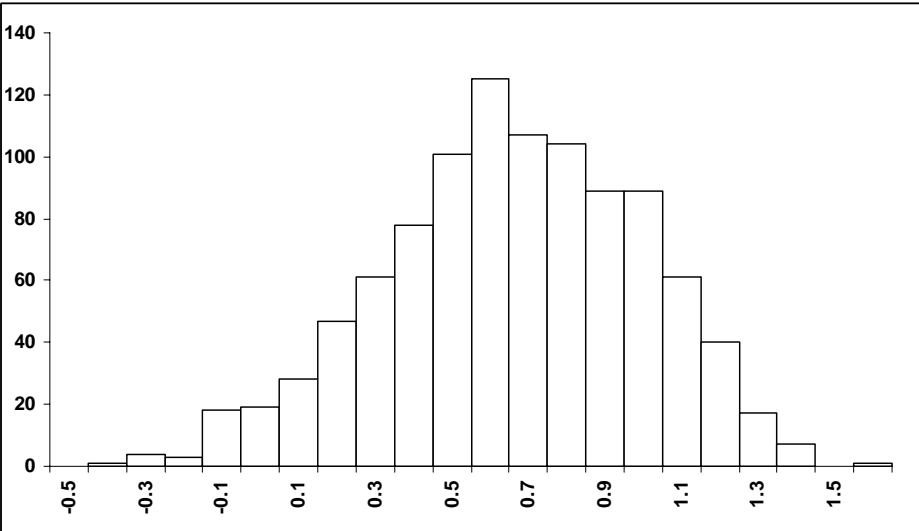

Supplement: pnas_0509210103_1.pdf [file pnas_0509210103_1.pdf]
